# Supplementary material for: A Systematic Review of the Epidemiology of Echinococcosis in Domestic and Wild Animals
Source: PubMed Central journal article supplement (PMC3674998; doi:10.1371/journal.pntd.0002249), 2013-06-06
Supplement: pntd.0002249.s002.pdf [file pntd.0002249.s002.pdf]

Table S1. Glossary of statistical terms

| Term                                         | Definition                                                                                                                                                                                                                                                                                                                                                                                                                                                                                                  |
|----------------------------------------------|-------------------------------------------------------------------------------------------------------------------------------------------------------------------------------------------------------------------------------------------------------------------------------------------------------------------------------------------------------------------------------------------------------------------------------------------------------------------------------------------------------------|
| Akaike information criterion (AIC)           | A measure of the relative goodness of fit of a statistical model. The second-order Akaike Information Criterion (AICc) is equivalent to AIC but with a correction for finite sample sizes. The Akaike difference Delta ( $\Delta AICc$ ) shows the difference between the model AICc and the lowest AICc for the model set. The AICc weights help to value the relative importance of each variable. Lower AIC/AICc, lower $\Delta AICc$ or higher AICc weight indicate good plausible models and viceversa |
| Analysis of variance                         | Statistical technique which assesses the effect of categorical explanatory variables on the response variable                                                                                                                                                                                                                                                                                                                                                                                               |
| Binomial logistic regression                 | Statistical method to analyse the association between a binomial response variable (such as presence/absence of infection) and one or more explanatory variables. In such logistic regression the response variable is transformed to the logistic scale                                                                                                                                                                                                                                                    |
| Coefficient of determination ( $R^2$ )       | Proportion of variation in the response variable explained by the statistical model                                                                                                                                                                                                                                                                                                                                                                                                                         |
| Conditional autoregressive spatial modelling | Type of regression model that captures spatial dependency and provides information on spatial relationships among the variables modeled                                                                                                                                                                                                                                                                                                                                                                     |
| Conditional logistic regression              | Type of logistic regression that analyses a categorical response variable when observations are not independent but matched or grouped in some way                                                                                                                                                                                                                                                                                                                                                          |
| Confidence intervals (CI)                    | Intervals that provide a range of values for a variable of interest constructed so that if the experiment can be repeated many times, the value of the parameter will lie within this interval in a confidence level of occasions, usually set to 95%                                                                                                                                                                                                                                                       |
| Correlation coefficient                      | Determines the degree of linear relationship between two variables                                                                                                                                                                                                                                                                                                                                                                                                                                          |
| Cross-sectional                              | Epidemiologic study involving the observation of a population, or a                                                                                                                                                                                                                                                                                                                                                                                                                                         |

|                              |                                                                                                                                                                                                     |
|------------------------------|-----------------------------------------------------------------------------------------------------------------------------------------------------------------------------------------------------|
| study                        | representative subset, at one specific point in time                                                                                                                                                |
| Determinant                  | Any factor or variable that can affect the frequency with which a disease occurs in a population                                                                                                    |
| Explanatory variable         | A factor or exposure that may influence the occurrence of the response variable                                                                                                                     |
| Fixed-effects model          | Type of model that treats the varying coefficients of explanatory variables as if the quantities were non-random (constant over all groups)                                                         |
| Interaction effect           | Situation when the effect of the explanatory variable(s) on the response variable depends on the value of another explanatory variable(s)                                                           |
| Linear regression            | Estimates the best-fitting straight line to describe the linear relationship between two variables                                                                                                  |
| Mixed-effects model          | Type of multilevel model that includes both fixed and random effects                                                                                                                                |
| Multilevel models            | Statistic models of parameters that vary at more than one level                                                                                                                                     |
| Multivariable analysis       | Statistic analysis that includes more than one explanatory variable and where any potential issues, such confounding and interaction, are taken into account                                        |
| Multivariate analysis        | Statistical analysis where there is more than one response variable regardless of the number of explanatory variables included                                                                      |
| Negative binomial regression | Type of statistical model that assumes that the dependent variable has an aggregated distribution described by the negative binomial distribution                                                   |
| Odds ratio (OR)              | Measure of association between exposure and disease. The OR represents the odds that disease will occur given a particular exposure, compared to the odds of disease occurring in the absence of it |
| Ordinal logistic regression  | Type of logistic regression that analyses an ordinal categorical response variable (with categories that have some intrinsic order) with one or more explanatory variables                          |
| $p$ -value                   | Probability of obtaining a test statistic at least as extreme as the one that was actually observed, assuming that the null hypothesis is true                                                      |
| Random-effects model         | Type of multilevel model which varying coefficients of explanatory variables have a different value for each of the groups (or levels)                                                              |

|                        |                                                                                                                                                           |
|------------------------|-----------------------------------------------------------------------------------------------------------------------------------------------------------|
| Response variable      | Variable that is the focus of the analysis, whose variation is trying to be explained by the explanatory variables                                        |
| Risk ratio (RR)        | Measure of association between exposure and disease. The RR gives a ratio of disease risk in the exposed compared to disease risk in the non-exposed      |
| Semivariogram          | Function describing the degree of spatial dependence of a spatial random field or stochastic process                                                      |
| Spatial scan statistic | Statistical method to test for spatial clustering                                                                                                         |
| Univariable analysis   | Statistic analysis that includes just one explanatory variable                                                                                            |
| Univariate analysis    | Statistic analysis that deals with a single response variable regardless of the number of explanatory variables included                                  |
| Variable               | Characteristic that can be measured in different individuals or groups capable of adopting different values                                               |
| Zero inflated model    | Type of count regression model when there are additional zero counts then can be described by a standard count model such as Poisson or negative binomial |
