# Supplementary material for: A Systematic Review of the Epidemiology of Echinococcosis in Domestic and Wild Animals
Source: PubMed Central journal article supplement (PMC3674998; doi:10.1371/journal.pntd.0002249), 2013-06-06
Supplement: pntd.0002249.s003.pdf [file pntd.0002249.s003.pdf]

Table S3. Studies assessing association between *E. granulosus* infection in dogs and potential access to raw offal

| Reference                   | Study Information                                                                                | Statistical Method                | Significant Factor                                                                                                                              |
|-----------------------------|--------------------------------------------------------------------------------------------------|-----------------------------------|-------------------------------------------------------------------------------------------------------------------------------------------------|
| Bchir et al., 1987 [29]     | Post-mortem inspection of 50 dogs in Central Tunisia                                             | Univariable analysis              | Dogs shot within 1 km of a refuse dump ( $p < 0.001$ )                                                                                          |
| Parada et al., 1995 [27]    | Arecoline purgation of 704 dogs in Durazno (Uruguay)                                             | Univariable analysis              | Dogs with access to fields ( $p < 0.05$ ) and not tied-up dogs ( $p < 0.001$ )                                                                  |
| Moro et al., 1999 [20]      | Arecoline purgation of 63 dogs in central Peruvian Andes                                         | Univariable analysis              | Dog fed with hydatid-infected viscera were ( $p < 0.004$ ) and sheep-dogs were more likely to be infected ( $p < 0.001$ )                       |
| Wang et al., 2001 [23]      | Coproantigen examination of 139 owned dogs in Narenhebuke commune (China)                        | Univariable analysis              | Dogs from the winter area presented higher coproantigen positivity than the ones from the summer pasture ( $p < 0.01$ )                         |
| Shaikenov et al., 2003 [25] | Arecoline purgation of 2,071 dogs in Southern Oblasts (Kazakhstan)                               | Univariable analysis              | Farm dogs present higher abundance of infection and prevalence ( $p < 0.001$ )                                                                  |
| Buishi et al., 2005 [24]    | Coproantigen examination of 334 dogs in Tripoli (Libya)                                          | Multivariable logistic regression | Sheep-dogs showed an increased risk of coproantigen positivity compared to household dogs (OR 9.791, 95%CI 1.081-88.66, $p = 0.042$ )           |
| Buishi et al., 2005 [33]    | Coproantigen examination of 1,164 farm dogs in Wales (UK)                                        | Multivariable logistic regression | Unrestrained dogs had higher risk of coproantigen positivity (OR 2.91, 95%CI 1.77-4.8, $p < 0.0001$ )                                           |
| Perez et al., 2006 [26]     | Coproantigen examination of 748 dog faecal samples from livestock farms in Rio Negro (Argentina) | Univariable analysis              | Dog prevalence increased with increasing number of dogs ( $p = 0.0028$ ) (i.e. OR 4.19, comparing having 1 dog with having $\geq 5$ ) and sheep |

|                                 |                                                                               |                                                 |                                                                                                                                                                                                                                                                                                     |
|---------------------------------|-------------------------------------------------------------------------------|-------------------------------------------------|-----------------------------------------------------------------------------------------------------------------------------------------------------------------------------------------------------------------------------------------------------------------------------------------------------|
|                                 |                                                                               |                                                 | ( $p=0.0039$ ) (i.e. OR 4.29, compared 0 with $\geq 2,501$ )                                                                                                                                                                                                                                        |
| Buishi et al., 2006 [21]        | Coproantigen examination of 161 dogs in Turkana (Kenya)                       | Multivariable logistic regression               | Dogs fed with raw offal (OR 22.74, 95%CI 2.60-199.08, $p=0.005$ ) and dogs free to roam were at higher risk of being coproantigen positive (OR 14.56, 95%CI 2.70-78.50, $p=0.002$ ) whereas the proper disposal of carcasses by dog-owners reduced such risk (OR 0.07, 95%CI 0.01-0.33, $p=0.001$ ) |
| El Shazly et al., 2007 [28]     | Post mortem examination of 540 dogs in Dakahlia (Egypt)                       | Univariable analysis                            | Rural dogs compared to urban dogs ( $p=0.03$ )                                                                                                                                                                                                                                                      |
| Guzel et al., 2008 [30]         | Coproantigen examination of 79 owned dogs in Antakya (Turkey)                 | Univariable analysis                            | Unrestrained dogs had increased risk of coproantigen positivity ( $p<0.05$ )                                                                                                                                                                                                                        |
| Huang et al., 2008 [31]         | Coproantigen examination of 23 stray dogs and 580 owned dogs in Tibet (China) | Univariable analysis                            | Unrestrained dogs ( $p<0.01$ ) compared to those tied during the day or/and night                                                                                                                                                                                                                   |
| Inangolet et al., 2010 [34]     | Post mortem examination of 327 dogs in the Moroto District (Uganda)           | Ordinal logistic regression                     | Stray dogs presented higher parasite burdens compared to domesticated dogs (OR 5.42, 95%CI 2.27–12.92), $p<0.001$ )                                                                                                                                                                                 |
| Acosta-Jamett et al., 2010 [22] | Coproantigen examination of 334 dogs in Coquimbo (Chile)                      | Multivariable mixed-effects logistic regression | Dogs from households not practising home-slaughter (OR 0.04, 90%CI 0.01–0.13, $p=0.001$ ), from rural sites (OR 0.01, 90%CI 0.002–0.05, $p=0.001$ ) and with longer                                                                                                                                 |

|                          |                                                             |                                                 |                                                                                                   |
|--------------------------|-------------------------------------------------------------|-------------------------------------------------|---------------------------------------------------------------------------------------------------|
|                          |                                                             |                                                 | distance to rural areas (OR 0.01, 90%CI 0.001–0.17, $p=0.007$ ) showed lower prevalence           |
| Mastin et al., 2011 [32] | Coproantigen examination of 577 dogs in South Powys (Wales) | Multivariable mixed-effects logistic regression | Dogs regularly roaming had higher coproantigen positivity (OR 4.93, 95%CI 1.87–13.00, $p=0.001$ ) |

Measures of association reported when available

Abbreviations: OR, odds ratio; CI, confidence interval.
