# Supplementary material for: A Systematic Review of the Epidemiology of Echinococcosis in Domestic and Wild Animals
Source: PubMed Central journal article supplement (PMC3674998; doi:10.1371/journal.pntd.0002249), 2013-06-06
Supplement: pntd.0002249.s004.pdf [file pntd.0002249.s004.pdf]

Table S3. Studies identifying significant associations of age/gender and infection of dogs with *E. granulosus*

| Reference                       | Study Information                                                   | Statistical Method                              | Significant Factor                                                                                                 |
|---------------------------------|---------------------------------------------------------------------|-------------------------------------------------|--------------------------------------------------------------------------------------------------------------------|
| Parada et al., 1995 [27]        | Arecoline purgation of 704 dogs in Durazno (Uruguay)                | Univariable analysis                            | Male dogs were more likely to be infected than females ( $p<0.05$ )                                                |
| Sharifi et al., 1996 [35]       | Post mortem examination of 6,500 dogs in Kerman (Iran)              | Univariable analysis                            | Dogs from 0-2 years showed higher prevalence compared to dogs of 3-4 years ( $p<0.05$ ) and >5 years ( $p<0.002$ ) |
| Buishi et al., 2005 [24]        | Coproantigen examination of 334 dogs in Tripoli (Libya)             | Multivariable logistic regression               | Dogs >5 years presented lower coproantigen positivity (OR 0.852, 95%CI 0.731-0.993, $p<0.04$ )                     |
| Buishi et al., 2006 [21]        | Coproantigen examination of 161 dogs in Turkana (Kenya)             | Multivariable logistic regression               | Dogs $\leq$ 5 years presented higher coproantigen-positive results (OR 0.47, 95% CI 0.29-0.76, $p=0.002$ )         |
| Acosta-Jamett et al., 2010 [22] | Coproantigen examination of 334 dogs in Coquimbo (Chile)            | Multivariable mixed-effects logistic regression | Dogs > 2 years presented lower odds of being coproantigen-positive (OR 0.11, 90% CI 0.04–0.29, $p=0.001$ )         |
| Inangolet et al., 2010 [34]     | Post mortem examination of 327 dogs in the Moroto District (Uganda) | Ordinal logistic regression                     | Dogs >5 years presented lower worm counts (OR 0.07, 95%CI 0.04–0.16, $p<0.001$ )                                   |

Measures of association reported when available

Abbreviations: OR, odds ratio; CI, confidence interval.
