# Supplementary material for: A Systematic Review of the Epidemiology of Echinococcosis in Domestic and Wild Animals
Source: PubMed Central journal article supplement (PMC3674998; doi:10.1371/journal.pntd.0002249), 2013-06-06
Supplement: pntd.0002249.s005.pdf [file pntd.0002249.s005.pdf]

Table S4. Studies assessing association between *E. granulosus* infection in dogs and socio-economic factors

| Reference                       | Study Information                                                                        | Statistical Method                              | Significant Factor                                                                                                                                                       |
|---------------------------------|------------------------------------------------------------------------------------------|-------------------------------------------------|--------------------------------------------------------------------------------------------------------------------------------------------------------------------------|
| Burridge et al., 1977 [37]      | Arecoline purgation of dogs to assess progress of hydatid control in New Zealand         | Multivariable regression                        | Percentage of Maori people was negatively related with rate of progress in disease control ( $R^2=0.215$ ) <sup>1</sup>                                                  |
| Pappaioanou et al., 1984 [36]   | Arecoline purgation of dogs to assess progress of anti-echinococcosis campaign in Cyprus | Multivariable logistic regression               | Ethnic village type was associated with higher dog prevalence ( $p<0.0001$ )                                                                                             |
| Parada et al., 1995 [27]        | Arecoline purgation of 704 dogs in Durazno (Uruguay)                                     | Univariable analysis                            | Dogs reported to be dewormed with praziquantel were less likely to be infected ( $p<0.01$ )                                                                              |
| Buishi et al., 2005 [33]        | Coproantigen examination of 1,164 farm dogs in Wales (UK)                                | Multivariable logistic regression               | Dogs not dewormed frequently (>6 months) presented higher risk of coproantigen positivity (OR 3.16, 95%CI 1.46–6.85, $p=0.004$ )                                         |
| Buishi et al., 2005 [24]        | Coproantigen examination of 334 dogs in Tripoli (Libya)                                  | Multivariable logistic regression               | Dog owners reporting lack of knowledge about hydatid disease presented an increased risk of having a positive coproantigen dog (OR 3.278, 95%CI 1.045-10.28, $p=0.042$ ) |
| Huang et al., 2008 [32]         | Coproantigen examination of 23 stray dogs and 580 owned dogs in Tibet (China)            | Univariable analysis                            | Dogs whose owners lacked hydatid transmission knowledge ( $p<0.05$ ) and did not have deworming practice ( $p<0.01$ )                                                    |
| Acosta-Jamett et al., 2010 [22] | Coproantigen examination of 334 dogs in Coquimbo (Chile)                                 | Multivariable mixed-effects logistic regression | Households reporting not have been dewormed their dogs in the last 2 months presented higher prevalence (OR 5.23, 90%CI 1.98–13.8,                                       |

|  |  |             |
|--|--|-------------|
|  |  | $p=0.005$ ) |
|--|--|-------------|

Measures of association reported when available

<sup>1</sup> The percentage of Maori people in the total population explained 21.5% of the variation in *E. granulosus* infection in dogs. No significant test is provided for the  $R^2$  change.

Abbreviations:  $R^2$ , Coefficient of determination; OR, odds ratio; CI, confidence interval.
