# Supplementary material for: A Systematic Review of the Epidemiology of Echinococcosis in Domestic and Wild Animals
Source: PubMed Central journal article supplement (PMC3674998; doi:10.1371/journal.pntd.0002249), 2013-06-06
Supplement: pntd.0002249.s006.pdf [file pntd.0002249.s006.pdf]

Table S5. Associative studies of *E. granulosus* infection in intermediate hosts

| Reference                     | Study Information                                                                                 | Statistical Method   | Significant Factor                                                                                                                                                                                                                                            |
|-------------------------------|---------------------------------------------------------------------------------------------------|----------------------|---------------------------------------------------------------------------------------------------------------------------------------------------------------------------------------------------------------------------------------------------------------|
| Pandey et al., 1986 [53]      | Abattoir survey of 2,246 sheep, 510 goats and 35 dromedaries in Morocco                           | Univariable analysis | Age increasing prevalence in sheep ( $p < 0.01$ )                                                                                                                                                                                                             |
| Abdul-Salam et al., 1988 [60] | Parasitological examination of 293 camels in Kuwait                                               | Univariable analysis | Females presented higher cyst infection ( $p = 0.015$ ) compared to males                                                                                                                                                                                     |
| Ming et al., 1992 [62]        | Parasitological examination of 2,106 sheep in the Xinjiang Uygur Autonomous Region (China)        | Univariable analysis | Females presented higher cyst prevalence ( $p < 0.0001$ )                                                                                                                                                                                                     |
| Cabrera et al., 1995 [58]     | Post-mortem examination of 501 sheep in Florida (Uruguay)                                         | Univariable analysis | Difference between age groups in sheep ( $p < 0.01$ )                                                                                                                                                                                                         |
| Njoroge et al., 2002 [38]     | Abattoir survey of 381 cattle, 588 sheep, 5,752 goats and 70 camels in Turkana (Kenya)            | Univariable analysis | Geographic location ( $p < 0.05$ )                                                                                                                                                                                                                            |
| Tashani et al., 2002 [54]     | Abattoir survey of 614 cattle, 1087 sheep, 881 goats and 428 camels in Benghazi (Libya)           | Univariable analysis | Age and prevalence correlated in sheep ( $p = 0.042$ ), cattle ( $p < 0.001$ ) and camels ( $p = 0.053$ ). Sheep had the highest hydatid infection ( $p < 0.01$ ) and goats the lowest ( $p < 0.01$ ). Higher prevalence in females than males ( $p < 0.01$ ) |
| Umur et al., 2003 [55]        | Abattoir survey of 1,355 cattle, 218 sheep and 104 goats in Burdur (Turkey)                       | Univariable analysis | The prevalence and number of cysts increased with age ( $p < 0.05$ )                                                                                                                                                                                          |
| Islam et al., 2003 [49]       | Abattoir survey of 405 cattle, 142 sheep, 292 goats and 108 buffaloes in Cox's Bazar (Bangladesh) | Univariable analysis | Host species and age ( $p < 0.001$ )                                                                                                                                                                                                                          |
| Sharma et al., 2004 [68]      | Parasitological examination of 236 pig meat samples in                                            | Univariable analysis | Higher prevalence in pigs reared in extensive conditions                                                                                                                                                                                                      |

|                                       |                                                                                                  |                                   |                                                                                                                |
|---------------------------------------|--------------------------------------------------------------------------------------------------|-----------------------------------|----------------------------------------------------------------------------------------------------------------|
|                                       | Punjab (India)                                                                                   |                                   | compared to intensive production ( $p < 0.05$ )                                                                |
| Ahmadi et al., 2005 [39]              | Abattoir survey of 661 camels in Iran                                                            | Univariable analysis              | Geographic location ( $p < 0.005$ )                                                                            |
| Ansari-Lari, 2005 [46]                | Retrospective abattoir study of 131,716 cattle, 577,090 sheep and 135,233 goats in Shiraz (Iran) | Univariable analysis              | Seasonal variations in prevalence ( $p < 0.0001$ )                                                             |
| Scala et al., 2006 [52]               | Abattoir survey of 771 sheep in Sardinia (Italy)                                                 | Multivariable logistic regression | Cyst infection increased with host age (OR 1.15, 95%CI 1.0736– 1.2478, $p < 0.0001$ )                          |
| Azlaf et al., 2006 [40]               | Abattoir survey of 618 cattle, 2,948 sheep, 2,337 goats, 482 camels and 455 equines in Morocco   | Univariable analysis              | Geographic origin and host species ( $p < 0.0001$ )                                                            |
| Banks et al., 2006 [41]               | Abattoir survey and retrospective abattoir data of 32,567 cattle in Queensland (Australia)       | Multivariable logistic regression | Geographic origin and age ( $p < 0.01$ )                                                                       |
| Daryani et al., 2007 [61]             | Abattoir survey of 928 cattle, 3,765 sheep, 445 goats and 243 buffaloes in Ardabil (Iran)        | Univariate analysis               | Female gender (sheep and cattle) ( $p < 0.001$ ) and seasonal prevalence patterns (sheep) ( $p < 0.001$ )      |
| Cringoli et al., 2007 [64]            | Abattoir survey of 2587 cattle and 612 water buffaloes in the Campania (Italy)                   | Univariable analysis              | Host species and sheep farms closer to cattle positive farms than water buffalo positive farms ( $p < 0.001$ ) |
| Lahmar et al., 2007 [43]              | Ultrasound screening of 1,039 sheep in the northeast of Tunisia                                  | Univariable analysis              | Geographic origin ( $p < 0.01$ ) and age ( $p < 0.05$ )                                                        |
| Christodouloupoulos et al., 2008 [56] | Abattoir survey of 700 hoggets and 1500 sheep in Thessaly (Greece)                               | Univariable analysis              | Age ( $p < 0.001$ )                                                                                            |
| Ernest et al., 2009 [45]              | Retrospective abattoir study of 2,677 cattle and 607 sheep and 3,047 goats in Arusha (Tanzania)  | Univariable analysis              | Host species ( $p < 0.001$ ) and geographic location ( $p < 0.001$ )                                           |
| Bruzinskaite et al., 2009 [50]        | Abattoir of 648 pigs in Southwestern (Lithuania)                                                 | Univariable analysis              | Age ( $p < 0.01$ ) and type of farm ( $p < 0.02$ )                                                             |
| Nonga et al., 2009 [63]               | Retrospective abattoir                                                                           | Univariable analysis              | Sheep and goats                                                                                                |

|                                 |                                                                                                                               |                                                  |                                                                                                                                            |
|---------------------------------|-------------------------------------------------------------------------------------------------------------------------------|--------------------------------------------------|--------------------------------------------------------------------------------------------------------------------------------------------|
|                                 | study of 115,186 cattle and 99,401 sheep and goats in Arusha (Tanzania)                                                       |                                                  | showed higher hydatid infection in 2005 (OR 2.2, $p<0.001$ ) and 2007 (OR 1.6, $p<0.001$ ) compared to cattle                              |
| Regassa et al., 2009 [42]       | Abattoir survey of 415 cattle in Southern Ethiopia                                                                            | Multivariable logistic regression                | Host origin (OR 2.8, 95%CI 1.18, 6.51, $p=0.021$ )                                                                                         |
| Kebede et al., 2009 [65]        | Abattoir study of 420 cattle and 340 sheep in Bahir Dar (Ethiopia)                                                            | Univariable analysis                             | Host species ( $p<0.001$ )                                                                                                                 |
| Ibrahim, 2010 [47]              | Abattoir survey of 2,668 cattle, 6,525 sheep, 3,578 goats and 140 camels in Al Baha (Saudi Arabia)                            | Multivariable logistic regression                | Host species, age, gender (cattle and sheep) and seasonal variations (sheep and goats) ( $p<0.05$ )                                        |
| Erbeto et al., 2010 [51]        | Abattoir survey of 1,053 sheep and 639 goats in Addis Ababa (Ethiopia)                                                        | Univariable analysis                             | Host species, age, gender and type of production system ( $p<0.05$ )                                                                       |
| Getaw et al., 2010 [66]         | Abattoir survey of 852 cattle, 92 sheep and 208 goats in central Ethiopia                                                     | Univariable analysis                             | Host species ( $p<0.001$ )                                                                                                                 |
| Acosta-Jamett et al., 2010 [44] | Retrospective abattoir study of 174,034 cattle, 35,404 sheep, 22,208 goats, 25,355 pigs and 9,391 equines in Coquimbo (Chile) | Linear correlation (Spearman's rank coefficient) | Host species ( $p<0.001$ ), geographic origin ( $p<0.001$ ) and negative correlation between prevalence in goats and rainfall ( $p=0.02$ ) |
| Zewdu et al., 2010 [59]         | Abattoir survey of 384 zebu cattle in Ambo (Ethiopia)                                                                         | Univariable analysis                             | Age ( $p<0.0001$ )                                                                                                                         |
| Bekele et al., 2011 [67]        | Abattoir survey of 546 cattle in southern Ethiopia                                                                            | Univariable analysis                             | Local breeds harboured higher infection levels ( $p=0.043$ )                                                                               |
| Fromsa et al., 2011 [48]        | Retrospective abattoir study of 22,863 cattle, 6,518 sheep, 1,753 goats, 417 camels and 150 pigs in Ethiopia                  | Univariable analysis                             | Host species ( $p<0.001$ ), higher altitude (cattle) ( $p<0.001$ ) and (sheep) ( $p<0.01$ )                                                |
| Marshet et al., 2011 [57]       | Abattoir survey of 611 sheep and 389 goats in Addis Ababa (Ethiopia)                                                          | Multivariable logistic regression                | Host species (OR 5.14, 95%CI 2.76-9.55, $p<0.0001$ ) and age (OR 1.68, 95%CI 1.22-2.85, $p<0.029$ )                                        |

Measures of association reported when available, except for Ibrahim (2010) due to the large number of odds ratios and corresponding confidence intervals calculated.  
Abbreviations: OR, odds ratio; CI, confidence interval.
