# Supplementary material for: A Systematic Review of the Epidemiology of Echinococcosis in Domestic and Wild Animals
Source: PubMed Central journal article supplement (PMC3674998; doi:10.1371/journal.pntd.0002249), 2013-06-06
Supplement: pntd.0002249.s007.pdf [file pntd.0002249.s007.pdf]

Table S6. Associative studies of *E. granulosus* infection in wild intermediate hosts

| Reference                    | Study Information                                                                                        | Statistical Method                | Significant Factor                                                                                                          |
|------------------------------|----------------------------------------------------------------------------------------------------------|-----------------------------------|-----------------------------------------------------------------------------------------------------------------------------|
| McNeill et al., 1987<br>[71] | Parasitological examination of 580 lungs of moose ( <i>Alces alces</i> ) in southwestern Quebec (Canada) | Univariable analysis              | Cyst intensity increased with moose age ( $p < 0.01$ )                                                                      |
| Messier et al., 1989<br>[70] | Parasitological examination of 232 lungs of moose ( <i>Alces alces</i> ) in southwestern Quebec (Canada) | Univariable analysis              | Cyst prevalence and infection increased with moose density ( $p < 0.01$ ) and were correlated with moose age ( $p < 0.01$ ) |
| Barnes et al., 2007<br>[69]  | Post mortem examination of 2,998 macropodids in Queensland (Australia)                                   | Multivariable logistic regression | Eastern grey kangaroos females harbour more cysts than males ( $p = 0.008$ )                                                |

Measures of association reported when available.
