# Supplementary material for: A Systematic Review of the Epidemiology of Echinococcosis in Domestic and Wild Animals
Source: PubMed Central journal article supplement (PMC3674998; doi:10.1371/journal.pntd.0002249), 2013-06-06
Supplement: pntd.0002249.s008.pdf [file pntd.0002249.s008.pdf]

Table S7. Studies identifying significant determinants of infection of foxes with *E. multilocularis*

| Reference                                   | Study Information                                                                            | Statistical Method                    | Significant Factor                                                                                                       |
|---------------------------------------------|----------------------------------------------------------------------------------------------|---------------------------------------|--------------------------------------------------------------------------------------------------------------------------|
| Tackmann et al., 1998 [81]                  | Post mortem examination of 4,374 foxes in Brandenburg (Germany)                              | Univariable analysis                  | Under high endemic conditions juveniles were found more frequently infected than adults ( $p<0.001$ )                    |
| Morishima et al., 1999 [80]                 | Coproantigen detection and egg examination of 534 fecal samples of foxes in Hokkaido (Japan) | Univariable analysis                  | Juveniles ( $p<0.001$ ) presented higher coproantigen positivity                                                         |
| Hofer et al., 2000 [76]                     | Post mortem examination of 388 red foxes in Zurich (Switzerland)                             | Univariable analysis                  | Sub-adults ( $p<0.05$ ) presented higher parasite burdens                                                                |
| Yimam et al., 2002 [77]                     | Post mortem examination of 67 red foxes in Otaru (Japan)                                     | Univariable analysis                  | Juveniles ( $p<0.021$ ) presented higher parasite burdens                                                                |
| Losson et al., 2003 [74]                    | Post mortem examination of 709 foxes in Wallonia (Belgium)                                   | Univariable analysis                  | Juveniles ( $p=0.01$ ) presented higher prevalence                                                                       |
| Fischer et al., 2005 [78]                   | Post mortem examination of 267 foxes in Geneva (Switzerland)                                 | Multivariable logistic regression     | Juveniles ( $p=0.013$ ) presented higher parasite burdens                                                                |
| Hegglin et al., 2007 [82]                   | Post mortem examination of 582 foxes in Zurich (Switzerland)                                 | Multivariable logistic regression     | Season * age (marked in juveniles) (AICc weight=0.69) and zone * age (marked for adults) (AICc weight=0.45) <sup>1</sup> |
| Brossard et al., 2007 [75]                  | Post mortem examination of 3,793 foxes in western Switzerland                                | Univariable analysis                  | Juveniles ( $p<0.001$ ) presented higher prevalence and infection intensity                                              |
| Ziadinov et al., 2010 [79]                  | Post mortem examination of 151 foxes in central Kyrgyzstan                                   | Zero-inflated negative binomial model | Prevalence decreased with age (OR 1.28, 95%CI 1.01-1.62, $p=0.042$ )                                                     |
| Bruzinskaitt-Schmidhalter et al., 2012 [83] | Post mortem examination of 310 red foxes in Lithuania                                        | Multivariable logistic regression     | Regressor parameters “juvenile” (95%CI [-0.54, -0.94]) and “male” (95%CI [1.20, 1.27]) were associated with parasite     |

Measures of association reported when available

(\*) Interaction term.

<sup>1</sup> The model explaining best the prevalence rate in foxes (lowest AICc) included the variables *Zone*, *season*, *age*, *zone × age*, *season × age*.

Abbreviations: OR, odds ratio; CI, confidence interval; AICc, Akaike's information criterion corrected for small samples sizes.
