# Supplementary material for: A Systematic Review of the Epidemiology of Echinococcosis in Domestic and Wild Animals
Source: PubMed Central journal article supplement (PMC3674998; doi:10.1371/journal.pntd.0002249), 2013-06-06
Supplement: pntd.0002249.s009.pdf [file pntd.0002249.s009.pdf]

Table S8. Studies assessing association between *E. multilocularis* infection in foxes and environmental factors

| Reference                     | Study Information                                                  | Statistical Method                | Significant Factor                                                                                                                                     |
|-------------------------------|--------------------------------------------------------------------|-----------------------------------|--------------------------------------------------------------------------------------------------------------------------------------------------------|
| Kritsky et al., 1978 [92]     | Post mortem examination of 1,153 foxes in North Dakota (EE.UU)     | Univariable analysis              | Seasonal variation of prevalence ( $p=0.0131$ )                                                                                                        |
| Tackmann et al., 1998 [81]    | Post mortem examination of 4,374 foxes in Brandenburg (Germany)    | Univariable analysis              | Variations in prevalence among 3 geographic zones ( $p<0.001$ )                                                                                        |
| Hofer et al., 2000 [76]       | Post mortem examination of 388 red foxes in Zurich (Switzerland)   | Univariable analysis              | Seasonal variation in prevalence in urban sub-adult males ( $p<0.001$ )                                                                                |
| Raoul et al. 2001 [88]        | Post mortem examination of 222 red foxes in Franche-Comté (France) | Univariable analysis              | Higher prevalence found in mid-altitude areas compared to low altitude areas ( $p<0.001$ )                                                             |
| Denzin et al., 2005 [91]      | Post mortem examination of 1,341 red foxes in Saxony-Anhalt        | Multivariable logistic regression | Negative association with probability of infestation and the average annual maximum temperature ( $p=0.00001$ )                                        |
| König et al. 2005 [84]        | Post mortem examination of 268 foxes in Bavaria (Germany)          | Univariable analysis              | Variations in prevalence among 3 geographic areas ( $p<0.001$ )                                                                                        |
| Miterpáková et al., 2006 [89] | Parasitological examination of 3,096 foxes in Slovakia             | Simple correlation                | Prevalence ( $p=0.021$ ) and abundance ( $p=0.020$ ) correlated with mean annual precipitation                                                         |
| Dubinsky et al., 2006 [85]    | Parasitological examination of 392 foxes in Poland                 | Univariable analysis              | Higher prevalence in the Polish border area with Slovakia ( $p=0.0009$ )                                                                               |
| Hegglin et al., 2007 [82]     | Post mortem examination of 582 foxes in Zurich (Switzerland)       | Multivariable logistic regression | Season (AICc weight=1) (i.e. summer/autumn vs winter, OR 0.78, 95%CI 0.38-1.61) and season * age (marked in juveniles) (AICc weight=0.69) <sup>1</sup> |
| Brossard et al., 2007         | Post mortem                                                        | Univariable analysis              | Variations in                                                                                                                                          |

|                               |                                                                                |                                                          |                                                                                                                                                                           |
|-------------------------------|--------------------------------------------------------------------------------|----------------------------------------------------------|---------------------------------------------------------------------------------------------------------------------------------------------------------------------------|
| [75]                          | examination of 3,793 foxes in western Switzerland                              |                                                          | prevalence among geographic areas and seasons depending on host age ( $p < 0.05$ )                                                                                        |
| Hanosset et al., 2008 [93]    | Post-mortem examination of 990 foxes in Wallonia (Belgium)                     | Univariable analysis                                     | Seasonal variations in prevalence. Summer/autumn, vs. winter/spring (OR 1.4, 95%CI 1.04–1.98, $p = 0.03$ )                                                                |
| Immelt et al., 2009 [87]      | Post mortem examination of 959 foxes in South Hesse and Middle Hesse (Germany) | Multivariable logistic regression                        | Higher parasite burdens associated with areas with high agriculture land and high amount of precipitation ( $p < 0.0001$ )                                                |
| Miterpáková et al., 2009 [90] | Post mortem examination of 4,026 foxes in the Slovak Republic                  | Simple correlation and multivariable logistic regression | Correlation between the mean annual precipitation and both prevalence ( $p = 0.022$ ) and worm burden ( $p = 0.021$ ). Regional differences in prevalence ( $p < 0.001$ ) |
| Casulli et al., 2010 [86]     | Post-mortem examination of 840 foxes in Hungary                                | Univariable analysis                                     | Prevalence and abundance higher in the north-western half than in the south-eastern half of the country ( $p < 0.001$ )                                                   |

Measures of association reported when available

(\*) Interaction term.

<sup>1</sup> The model explaining best the prevalence rate in foxes (lowest AICc) included the variables *Zone*, *season*, *age*, *zone × age*, *season × age*.

Abbreviations: OR, odds ratio; CI, confidence interval; AICc, Akaike's information criterion corrected for small samples sizes.
