# Supplementary material for: A Systematic Review of the Epidemiology of Echinococcosis in Domestic and Wild Animals
Source: PubMed Central journal article supplement (PMC3674998; doi:10.1371/journal.pntd.0002249), 2013-06-06
Supplement: pntd.0002249.s010.pdf [file pntd.0002249.s010.pdf]

Table S9. Spatial studies of *E. multilocularis* in foxes

| Reference                  | Study Information                                                                                                                   | Statistical Method                                                                                         | Significant Factor                                                                                                                           |
|----------------------------|-------------------------------------------------------------------------------------------------------------------------------------|------------------------------------------------------------------------------------------------------------|----------------------------------------------------------------------------------------------------------------------------------------------|
| Berke, 2001 [94]           | Choropleth mapping of regional prevalence estimates based on parasitological examination from 5,365 foxes in Lower Saxony (Germany) | Conditional autoregressive spatial modelling                                                               | Raised prevalence in the southern and northern parts modeled with a second-order polynomial model ( $p \leq 0.05$ )                          |
| Staubach et al., 2001 [98] | Spatial analysis of infection status of 3,521 foxes on the background of geographic vector data in Brandenburg (Germany)            | Univariable analysis                                                                                       | Infected foxes were collected closer to water bodies ( $p=0.0048$ ), areas of high soil humidity ( $p=0.013$ ) and on pastures ( $p=0.078$ ) |
| Berke et al., 2002 [95]    | Spatial analysis of parasitological examination of 5,365 red foxes in Lower Saxony (Germany)                                        | Spatial scan statistic                                                                                     | Identification of disease cluster area from 1991-1997 (RR 4.80, 95%CI 4.11-5.63, $p=0.001$ )                                                 |
| Pleydell et al., 2004 [97] | Spatial investigation of coproantigen patterns of 345 faecal samples from foxes in the Franche-Comté region (France)                | Non-linear regression and semivariogram                                                                    | The inclusion of the grassland index improved consistently the fitting of the models ( $p < 0.05$ )                                          |
| Denzin et al., 2005 [91]   | Post mortem examination of 1,341 red foxes in Saxony-Anhalt                                                                         | Spatial scan statistic                                                                                     | Identification of a clusters with increased risk of infection (RR 4.4, 95%CI 2.6-5.0, $p=0,001$ )                                            |
| Berke et al., 2008 [96]    | Spatial-temporal analyses of parasitological examination of 8,459 foxes in Lower Saxony (Germany)                                   | Spatial scan statistic                                                                                     | Fox infection was clustered in the southern part ( $p \leq 0.01$ )                                                                           |
| Fuglei et al., 2008 [99]   | Spatial coproantigen investigation of 473 arctic fox faecal samples from Svalbard (Norway)                                          | Estimation of fox feces densities by line transect methods and score confidence limits for the proportions | Highest proportion of fox coproantigen positive feces overlapped voles' geographical range ( $p \leq 0.05$ )                                 |

Measures of association reported when available

Abbreviations: RR, risk ratio; OR, odds ratio; CI, confidence interval; AIC, Akaike information criterion.
