# Supplementary material for: A Systematic Review of the Epidemiology of Echinococcosis in Domestic and Wild Animals
Source: PubMed Central journal article supplement (PMC3674998; doi:10.1371/journal.pntd.0002249), 2013-06-06
Supplement: pntd.0002249.s011.pdf [file pntd.0002249.s011.pdf]

Table S10. Studies assessing association between *E. multilocularis* infection in foxes and host population factors

| Reference                     | Study Information                                                          | Statistical Method                               | Significant Factor                                                                                                                                               |
|-------------------------------|----------------------------------------------------------------------------|--------------------------------------------------|------------------------------------------------------------------------------------------------------------------------------------------------------------------|
| Saitoh et al., 1998 [103]     | Post mortem examination of 9,828 red foxes in Hokkaido (Japan)             | Multivariable logistic regression                | Vole abundance affected infection rates in foxes ( $p < 0.001$ )                                                                                                 |
| Hofer et al., 2000 [76]       | Post mortem examination of 388 red foxes in Zurich (Switzerland)           | Univariable analysis                             | Higher prevalence in foxes from rural areas ( $p < 0.01$ ) vs. urban areas during winter                                                                         |
| Stieger et al., 2002 [102]    | Coproantigen examination of 604 fox faecal samples in Zurich (Switzerland) | Univariable analysis                             | Higher positive results in border and peri-urban zone compare to urban zone during winter ( $p < 0.01$ )                                                         |
| Raoul et al., 2003 [105]      | Coproantigen examination of 156 fox faecal samples in Le Souillot (France) | Univariable analysis                             | Decrease of infection as fox numbers reduce ( $p = 0.0004$ )                                                                                                     |
| Fischer et al., 2005 [78]     | Post mortem examination of 267 foxes in Geneva (Switzerland)               | Multivariable logistic regression                | Level of urbanization. Rural vs urban (OR 2.73, 95%CI 1.24-5.97, $p = 0.012$ ) and border vs urban (OR 2.32, 95%CI 1.03-5.18, $p = 0.04$ )                       |
| Tanner et al., 2006 [104]     | Post mortem examination of 543 foxes in Grisons (Switzerland)              | Linear correlation (Spearman's rank coefficient) | Prevalence correlated with predation on intermediate hosts ( <i>Microtus/Pitymys</i> ) ( $p = 0.018$ )                                                           |
| Miterpáková et al., 2006 [89] | Parasitological examination of 3,096 foxes in Slovakia                     | Simple correlation                               | Prevalence correlated with density of small mammals ( $p = 0.022$ )                                                                                              |
| Reperant et al., 2007 [100]   | Post mortem examination of 228 red foxes in Geneva (Switzerland)           | Multivariable logistic regression                | Decrease prevalence from rural to urban areas ( $p = 0.037$ )                                                                                                    |
| Hegglin et al., 2007 [82]     | Post mortem examination of 582 foxes in Zurich (Switzerland)               | Multivariable logistic regression                | Type of urbanization zone (AICc weight=1) (i.e. Border vs. peri-urban, OR 0.46 95%CI 0.25-0.85) and zone age (marked for adults) (AICc weight=0.45) <sup>1</sup> |
| Hanosset et al., 2008         | Post mortem                                                                | Linear correlation                               | Positive correlation                                                                                                                                             |

|                             |                                                            |                                   |                                                                                                                                               |
|-----------------------------|------------------------------------------------------------|-----------------------------------|-----------------------------------------------------------------------------------------------------------------------------------------------|
| [93]                        | examination of 990 foxes in Wallonia (Belgium)             | (Spearman's rank coefficient)     | between prevalence in foxes and muskrats (Spearman's rank correlation coefficient=1, $p<0.0001$ )                                             |
| Robardet et al., 2008 [101] | Post mortem examination of 127 red foxes in Nancy (France) | Multivariable logistic regression | Type of urbanization zone (AICc weight=0.94). Urban vs. rural (OR 0.04, 95%CI 0.01-0.14) and peri-urban vs. rural (OR 0.38, 95%CI 0.14-1.01). |

Measures of association reported when available

(\*) Interaction term.

<sup>1</sup> The model explaining best the prevalence rate in foxes (lowest AICc) included the variables *Zone*, *season*, *age*, *zone × age*, *season × age*.

Abbreviations: OR, odds ratio; CI, confidence interval; AICc, Akaike's information criterion corrected for small samples sizes.
