# Supplementary material for: A Systematic Review of the Epidemiology of Echinococcosis in Domestic and Wild Animals
Source: PubMed Central journal article supplement (PMC3674998; doi:10.1371/journal.pntd.0002249), 2013-06-06
Supplement: pntd.0002249.s012.pdf [file pntd.0002249.s012.pdf]

Table S11. Associative studies of *E. multilocularis* infection in carnivores, other than foxes

| Reference                    | Study Information                                                                            | Statistical Method                            | Significant Factor                                                                                                                                                               |
|------------------------------|----------------------------------------------------------------------------------------------|-----------------------------------------------|----------------------------------------------------------------------------------------------------------------------------------------------------------------------------------|
| Budke et al., 2005 [12]      | Arecoline purgation of 371 owned dogs in the Tibetan Plateau (China)                         | Multivariable logistic regression             | Dogs being allowed to roam were more likely of be infected (OR 0.3693, 95%CI 0.1593–0.8558, $p=0.02$ )                                                                           |
| Wang et al., 2007 [106]      | Collection of faecal samples and arecoline purgation of 252 dogs in the Shiqu County (China) | Multivariable conditional logistic regression | Canine infection related with the density of small mammal burrows in the open pastures (OR=1.048, $p=0.003$ )                                                                    |
| Ziadinov et al., 2008 [109]  | Arecoline purgation of 466 owned dogs in At-Bashy (Kyrgyzstan)                               | Multivariable logistic regression             | Dogs being allowed to roam (OR 0.39, 95%CI 0.199– 0.749, $p=0.0056$ ) and hunting dogs (OR 4.2, 95%CI 1.89–9.68, $p=0.0005$ ) were more likely of be infected                    |
| Dyachenko et al., 2008 [110] | Cross-sectional survey of faecal samples of 17,894 dogs and 9,064 cats in Germany            | Univariable analysis                          | Higher dog prevalence found in the south compared with the north (OR 2.6, 95%CI 1.4-4.9, $p<0.01$ )                                                                              |
| Antolova et al., 2009 [108]  | Coprological examination of 289 dogs in Slovakia                                             | Multivariable logistic regression             | Dogs being fed with raw offal (OR 7.05, 95%CI 1.24-40.09, $p=0.025$ ) and dogs that used to catch rodents (OR 6.09, 95%CI 1.16-32.01, $p=0.04$ ) were more likely to be infected |
| Wang et al., 2010 [107]      | Arecoline purgation of 228 owned dogs Shiqu County (China)                                   | Multivariable logistic regression             | Parasite burden in dogs was related to the maximum burrow density of intermediate host <i>Ochotona spp.</i> ( $p=0.022$ )                                                        |
| Liccioli et al., 2012 [111]  | Post-mortem examination of 61 coyotes in Calgary (Canada)                                    | Univariable analysis                          | Higher prevalence in juveniles ( $p=0.035$ )                                                                                                                                     |
| Catalano et al., 2012        | Post-mortem                                                                                  | Univariable analysis                          | Higher infection in                                                                                                                                                              |

|                                             |                                                       |                                   |                                                                                               |
|---------------------------------------------|-------------------------------------------------------|-----------------------------------|-----------------------------------------------------------------------------------------------|
| [112]                                       | examination of 91 coyotes in Alberta (Canada)         |                                   | male than female coyotes ( $p=0.05$ )                                                         |
| Bruzinskaite-Schmidhalter et al., 2012 [83] | Post mortem examination of 310 red foxes in Lithuania | Multivariable logistic regression | Higher parasite abundance in raccoon dogs in autumn than winter (RR 0.002, 95%CI 0.0005-0.01) |

Measures of association reported when available

Abbreviations: OR, odds ratio; RR, risk ratio; CI, confidence interval
