# Supplementary material for: A Systematic Review of the Epidemiology of Echinococcosis in Domestic and Wild Animals
Source: PubMed Central journal article supplement (PMC3674998; doi:10.1371/journal.pntd.0002249), 2013-06-06
Supplement: pntd.0002249.s013.pdf [file pntd.0002249.s013.pdf]

Table S12. Associative studies on *E. multilocularis* infection in intermediate hosts

| Reference                    | Study Information                                                                           | Statistical Method                | Significant Factor                                                                                                             |
|------------------------------|---------------------------------------------------------------------------------------------|-----------------------------------|--------------------------------------------------------------------------------------------------------------------------------|
| Leiby et al., 1974 [115]     | Parasitological examination of 5,638 <i>Peromyscus maniculatus</i> in North Dakota (EEUU)   | Analysis of variance              | Age ( $p=0.0001$ ), habitat ( $p=0.0002$ ), season ( $p=0.002$ ), age*season ( $p=0.003$ ) and habitat*season ( $p=0.04$ )     |
| Gottstein et al., 2001 [114] | Parasitological examination of 513 rodents in Fribourg (Switzerland)                        | Univariable analysis              | Yearly fluctuation of prevalence ( $p<0.005$ ) for <i>Arvicola terrestris</i>                                                  |
| Henttonen et al., 2001 [119] | Parasitological examination of 224 <i>Microtus rossiaemeridionalis</i> in Svalbard (Norway) | Multivariable logistic regression | Overwintered adults ( $p<0.001$ ) and prevalence variation related with body weight and length ( $p<0.001$ )                   |
| Stieger et al., 2002 [102]   | Parasitological examination of 1,155 rodents in Zurich (Switzerland)                        | Univariable analysis              | Adults ( $p<0.001$ ) showed higher prevalence and prevalence variation by trapping site ( $p=0.019$ ) for <i>A. terrestris</i> |
| Hanosset et al., 2008 [93]   | Parasitological examination of 1,249 rodents in Wallonia (Belgium)                          | Univariable analysis              | Adult muskrats <i>Ondatra zibethicus</i> ( $p=6.56 \times 10^{-6}$ ) presented higher prevalence                               |
| Reperant et al., 2009 [117]  | Parasitological examination of 658 rodents in Geneva (Switzerland)                          | Multivariable logistic regression | Body weight and geographical area ( $p<0.0001$ ) for <i>Arvicola terrestris</i>                                                |
| Stien et al., 2010 [118]     | Parasitological examination of 387 sibling voles in Svalbard (Norway)                       | Multivariable logistic regression | Sample site and vole length ( $p<0.0001$ ), year of sampling, sample site * year and sample site vole length ( $p=0.02$ )      |
| Burlet et al., 2011 [116]    | Parasitological examination of 856 <i>A. terrestris</i> in Zurich (Switzerland)             | Multivariable logistic regression | Age (>7 months), period, area and mean day temperature included in the best-fitting model with the lowest AICc (-244.04)       |

Measures of association reported when available

(\*) Interaction term.

Abbreviations: OR, odds ratio; CI, confidence interval; AICc, Akaike's information criterion corrected for small samples sizes.
